# Supplementary material for: Recurrent mutations in a SERPINC1 hotspot associate with venous thrombosis without apparent antithrombin deficiency
Source: PubMed Central journal article supplement (PMC5663607; doi:10.18632/oncotarget.21365), 2017-09-28
Supplement: oncotarget-08-84417-s001.pdf [file oncotarget-08-84417-s001.pdf]

## Recurrent mutations in a *SERPINC1* hotspot associate with venous thrombosis without apparent antithrombin deficiency

### SUPPLEMENTARY MATERIALS

**Supplementary Table 1: PCR primers and conditions used for constructing recombinant expression of antithrombin variants**

| Primer | Forward sequence (5'→3')                        | Reverse sequence (5'→3')                        | Annealing temp. (°C) | Product size (bp) |
|--------|-------------------------------------------------|-------------------------------------------------|----------------------|-------------------|
| 883G>A | TTATCGGGC <i><u>C</u></i> ATGGCTGAAGGCACCCAGGTG | CCTTCAGCCA <i><u>T</u></i> GCGCCGATAACGGAACTGC  | 68                   | 7218              |
| 881G>T | CGTTATCGGGC <i><u>T</u></i> CGTGGCTGAAGGCACCCAG | TTCAGCCACG <i><u>G</u></i> CCGATAACGGAACTGCCTT  | 68                   | 7218              |
| 881G>A | CGTTATCGGGC <i><u>A</u></i> CGTGGCTGAAGGCACCCAG | TTCAGCCACG <i><u>T</u></i> GCCGATAACGGAACTGCCTT | 68                   | 7218              |
| 880C>T | CCGTTATCGGG <i><u>T</u></i> GCGTGGCTGAAGGCACCCA | CAGCCACGC <i><u>A</u></i> CCGATAACGGAACTGCCTTC  | 68                   | 7218              |

The underlined and italicized bases were used introduce the mutations.
